# Supplementary material
Source: PubMed Central journal article supplement (PMC3256662)
Supplement: supp_194.2.448_FigS1-S2.pdf [file supp_194.2.448_FigS1-S2.pdf]

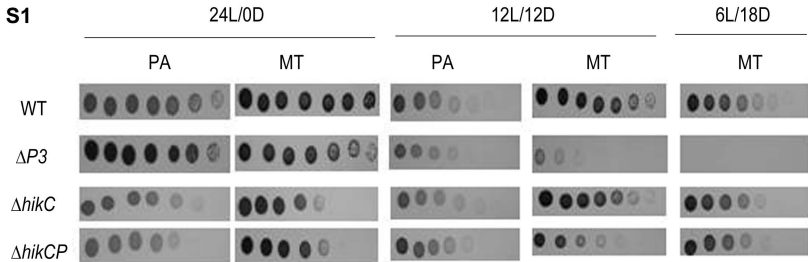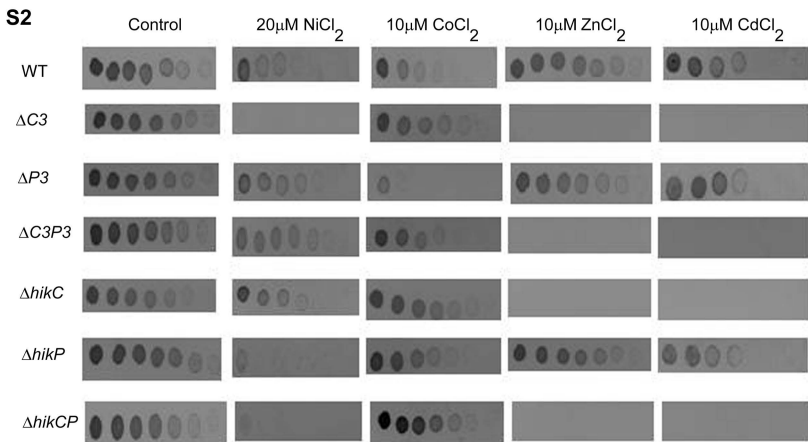

SUPPLEMENTAL FIGURE S1. Growth of the WT,  $\Delta P3$ ,  $\Delta hikC$  and  $\Delta hikCP$  mutants on solid media in PA and MT conditions. Cultures for the plating experiment were handled as described in the materials and methods. Plates were incubated at 30°C for 8 days at 60  $\mu\text{E m}^{-2} \text{s}^{-1}$  light intensity for 24L/0D and 30  $\mu\text{E m}^{-2} \text{s}^{-1}$  light intensity for 12L/12D and 6L/18D.  $\Delta hikC$  and  $\Delta hikCP$  showed a higher light sensitivity on plates in either PA or MT LL only with 60  $\mu\text{E m}^{-2} \text{s}^{-1}$  light.  $\Delta P3$  had problems as the amount of light decreased and it did not grow at all under MT 6L/18D conditions. The  $\Delta hikC$  mutant grew better in MT 12L/12D conditions on plates than in LL.  $\Delta hikCP$  showed poorer growth in both the MT LD conditions and was intermediate to the WT and  $\Delta P3$ . This mutant was more sensitive to glucose on plates in MT LD in ambient CO<sub>2</sub>, and grows better after 4 days in liquid, indicating that there may be some exchange of metabolites in liquid that is not possible on plates below a certain cell density.

SUPPLEMENTAL FIGURE S2. Tolerance of WT and the operon and *hik* mutants to different metals based on plate growth. Cultures for the plating experiment were handled as described in the materials and methods. 20  $\mu\text{M}$  of nickel chloride, 10  $\mu\text{M}$  of cobalt chloride, zinc chloride, and cadmium chloride were used for each of the cultures to assess tolerance. Plates were incubated at 30°C at 30  $\mu\text{E m}^{-2} \text{s}^{-1}$  light intensity for 8 days in 24L/0D prior to photography.
